# Supplementary material for: Transcriptomic Profiling Reveals That HMGB1 Induces Macrophage Polarization Different from Classical M1
Source: MDPI journal article supplement (doi:10.3390/biom12060779), 2022-06-02
Supplement: s1 [file s1]

# Transcriptomic Profiling Reveals that HMGB1 Induces Macrophage Polarization Different from Classical M1

## Supplementary documents

### Contents

|                                                                                                                                                           |   |
|-----------------------------------------------------------------------------------------------------------------------------------------------------------|---|
| Supplementary Tables .....                                                                                                                                | 2 |
| Supplementary Table S1. RNA-Seq quality control .....                                                                                                     | 2 |
| Supplementary Table S2. qPCR primer pairs sequence.....                                                                                                   | 2 |
| Supplementary Figures.....                                                                                                                                | 3 |
| Supplementary Figure S1. dsHMGB1-stimulation distinctively upregulated and downregulated genes comparing with LPS- and LPS/IFN $\gamma$ -stimulation..... | 3 |
| Supplementary Figure S2. qPCR validation of the foam cell formation featured genes identified by RNA-Seq.....                                             | 4 |
| Supplementary Figure S3. Effect of HMGB1 on foam cell formation from BMDM. ....                                                                           | 5 |
| Supplementary Figure S4. Gene expression of scavenger receptors to oxLDL.. ....                                                                           | 6 |

## Supplementary Tables

**Supplementary Table S1. RNA-Seq quality control**

| Sample    | Barcode sequence      | PF Clusters | % of the | % Perfect | % One mismatch | Yield (Mbases) | % PF     | % >= Q30 | Mean Quality |
|-----------|-----------------------|-------------|----------|-----------|----------------|----------------|----------|----------|--------------|
|           |                       |             | lane     | barcode   | barcode        |                | Clusters | bases    | Score        |
| PBS-1     | TGGTACCTAA+AGTACTCATG | 40,219,989  | 10.31    | 97.29     | 2.71           | 4,183          | 100      | 91.3     | 32.67        |
| PBS-2     | TTGGAATTCC+GTATTGACGT | 40,959,722  | 10.5     | 96.97     | 3.03           | 4,260          | 100      | 91.34    | 32.67        |
| PBS-3     | CCTCTACATG+AGGAGGTATC | 32,074,721  | 8.22     | 97.69     | 2.31           | 3,336          | 100      | 91.1     | 32.63        |
| M1-1      | GGAGCGTGTA+ACTTACGGAT | 41,671,277  | 10.68    | 98.06     | 1.94           | 4,334          | 100      | 91.19    | 32.65        |
| M1-2      | GTCCGTAAGC+AAGATACACG | 41,829,791  | 10.72    | 97.7      | 2.3            | 4,350          | 100      | 91.26    | 32.66        |
| M1-3      | ACTCAAGCG+TTCATGGTTC  | 49,042,165  | 12.57    | 96.92     | 3.08           | 5,100          | 100      | 91.05    | 32.62        |
| dsHMGB1-1 | TCAGAAGGCG+TATGATGGCC | 40,424,779  | 10.36    | 89.65     | 10.35          | 4,204          | 100      | 90.96    | 32.61        |
| dsHMGB1-2 | GCGTTGGTAT+GGAAGTATGT | 48,463,863  | 12.42    | 97.23     | 2.77           | 5,040          | 100      | 91.41    | 32.69        |
| dsHMGB1-3 | ACATATCCAG+ATTGCACATA | 41,914,272  | 10.75    | 96.97     | 3.03           | 4,359          | 100      | 91.2     | 32.65        |
| LPS-1     | GAGACGAT+ACCGGTTA     | 35,088,196  | 7.83     | 97.06     | 2.94           | 4,281          | 100      | 93.78    | 33.06        |
| LPS-2     | CTTGTCGA+CGATGTTC     | 30,944,204  | 6.9      | 97.71     | 2.29           | 3,775          | 100      | 93.76    | 33.06        |
| LPS-3     | TTCCAAGG+CTACAAGG     | 31,647,602  | 7.06     | 96.95     | 3.05           | 3,861          | 100      | 93.81    | 33.07        |
| frHMGB1-1 | CTGATCGT+GCGCATAT     | 26,770,027  | 5.97     | 96.65     | 3.35           | 3,266          | 100      | 93.65    | 33.04        |
| frHMGB1-2 | ACTCTCGA+CTGTACCA     | 27,519,820  | 6.14     | 97.48     | 2.52           | 3,357          | 100      | 93.46    | 33           |
| frHMGB1-3 | TGAGCTAG+GAACGGTT     | 26,044,916  | 5.81     | 95.87     | 4.13           | 3,177          | 100      | 93.98    | 33.1         |

**Supplementary Table S2. qPCR primer pairs sequence**

| Gene    | F/R | Sequence(5'-3')        |
|---------|-----|------------------------|
| Abca1   | F   | GGTCTCCAGAAGGTATTTTG   |
|         | R   | TCAGGATGTCCATGTTGTAG   |
| Ccr7    | F   | GAGAGAGACAAGAACCAAAAG  |
|         | R   | CTGGAAAATGACAAGGAGAG   |
| Cnr2    | F   | AAAGTGTGAGAGCAAGAAAC   |
|         | R   | TTTGGCTTCTTCTACTGGAG   |
| Cxcl9   | F   | GAGGAACCTAGTGATAAGG    |
|         | R   | GTTTGATCTCCGTTCTTCAG   |
| Gapdh   | F   | CAAGGTCATCCATGACAACTTG |
|         | R   | GTCCACCACCCTGTTGCTGTAG |
| Hamp    | F   | CATCAACAGATGAGACAGAC   |
|         | R   | ATTTACAGCAGAAGATGCAG   |
| Il12b   | F   | CATCAGGGACATCATCAAC    |
|         | R   | CTCTGTCTCCTTCATCTTTC   |
| Il33    | F   | GAACATGAGTCCCATCAAAG   |
|         | R   | CAGCTGGTTATCTTTACTCC   |
| Lpl     | F   | GAGACTCAGAAAAAGGTCATC  |
|         | R   | GTCTTCAAAGAACTCAGATGC  |
| Lrrc17  | F   | GAGGAAAGAGTTGAAGAAAGTC |
|         | R   | GTGTATGAGCCCTAAAAAGG   |
| Madcam1 | F   | GGAGATTCCAGTACTACAGAG  |
|         | R   | TTGATGAGGTCAGGATGTAG   |
| Nr1h3   | F   | GATGTTTCTCCTGATTCTGC   |
|         | R   | CTCCAACCCTATCCCTAAAG   |
| Osbpl3  | F   | CAAGAGCCAAGCTGATATTG   |
|         | R   | GTTCTTCTGACTTCACCTTC   |
| Pf4     | F   | TAGCCACCCTGAAGAATG     |
|         | R   | GACATTAGGCAGCTGATAC    |

## Supplementary Figures

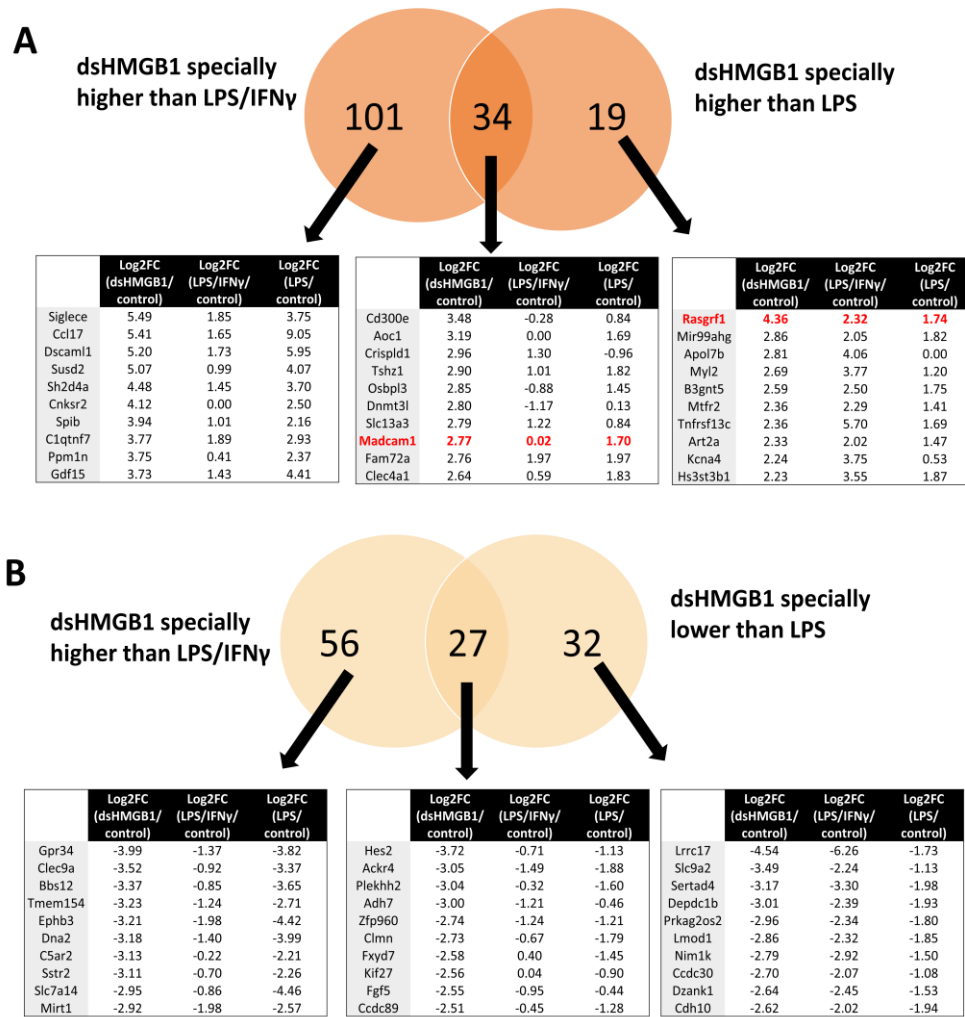

**Supplementary Figure S1. dsHMGB1-stimulation distinctively upregulated and downregulated genes comparing with LPS- and LPS/IFN $\gamma$ -stimulation.** (A) 135 genes were upregulated by dsHMGB1 but not significantly changed by LPS/IFN $\gamma$ ; 53 genes were upregulated by dsHMGB1 but not significantly changed in LPS. There were 34 common genes between the two lists. The top 10 genes of each compartment with their log2FoldChange (Log2FC) in dsHMGB1, LPS/IFN $\gamma$ , LPS groups are listed below the Venn diagram. Genes highlighted in red were validated by qPCR in Figure 4. (B) 83 genes were upregulated by dsHMGB1 but not significantly changed by LPS/IFN $\gamma$ ; 59 genes were upregulated by dsHMGB1 but not significantly changed in LPS. There were 27 common genes between the two lists. The top 10 genes with their log2FC in dsHMGB1, LPS/IFN $\gamma$ , LPS groups are listed below the Venn diagram.

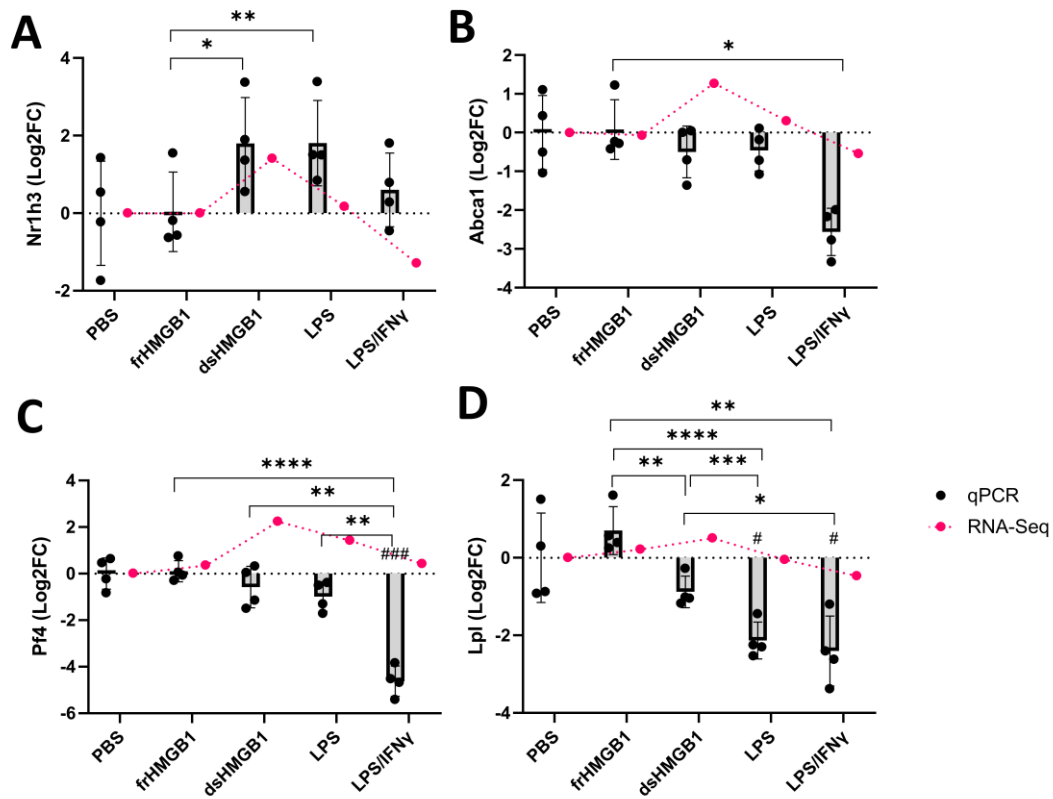

**Supplementary Figure S2. qPCR validation of the foam cell formation featured genes identified by RNA-Seq.** Expression of *Nr1h3* (A), *Abca1* (B), *Pf4* (C) and *Lpl* (D) were determined using qPCR in BMDMs stimulated for 24 hours by frHMGB1, dsHMGB1, LPS and LPS/IFN $\gamma$ , n=4 mice, 2 replicates/mouse/condition. Gene expression is represented as Log2FoldChange (Log2FC) relative to the mean of the PBS group, and the scale bars represent the standard deviations. Red dots represented the RNA-Seq results. Statistical comparisons were performed using RM-one way ANOVA with Turkey's multiple comparisons test on data that are normally distributed or using Friedman test with Dunn's multiple comparisons on data that are not normally distributed. # = significant comparing with control; \*=significant comparing between two treatment groups. \*/#,  $p < 0.05$ ; \*\*,  $p < 0.01$ ; \*\*\*/###,  $p < 0.001$ ; \*\*\*\*,  $p < 0.0001$ .

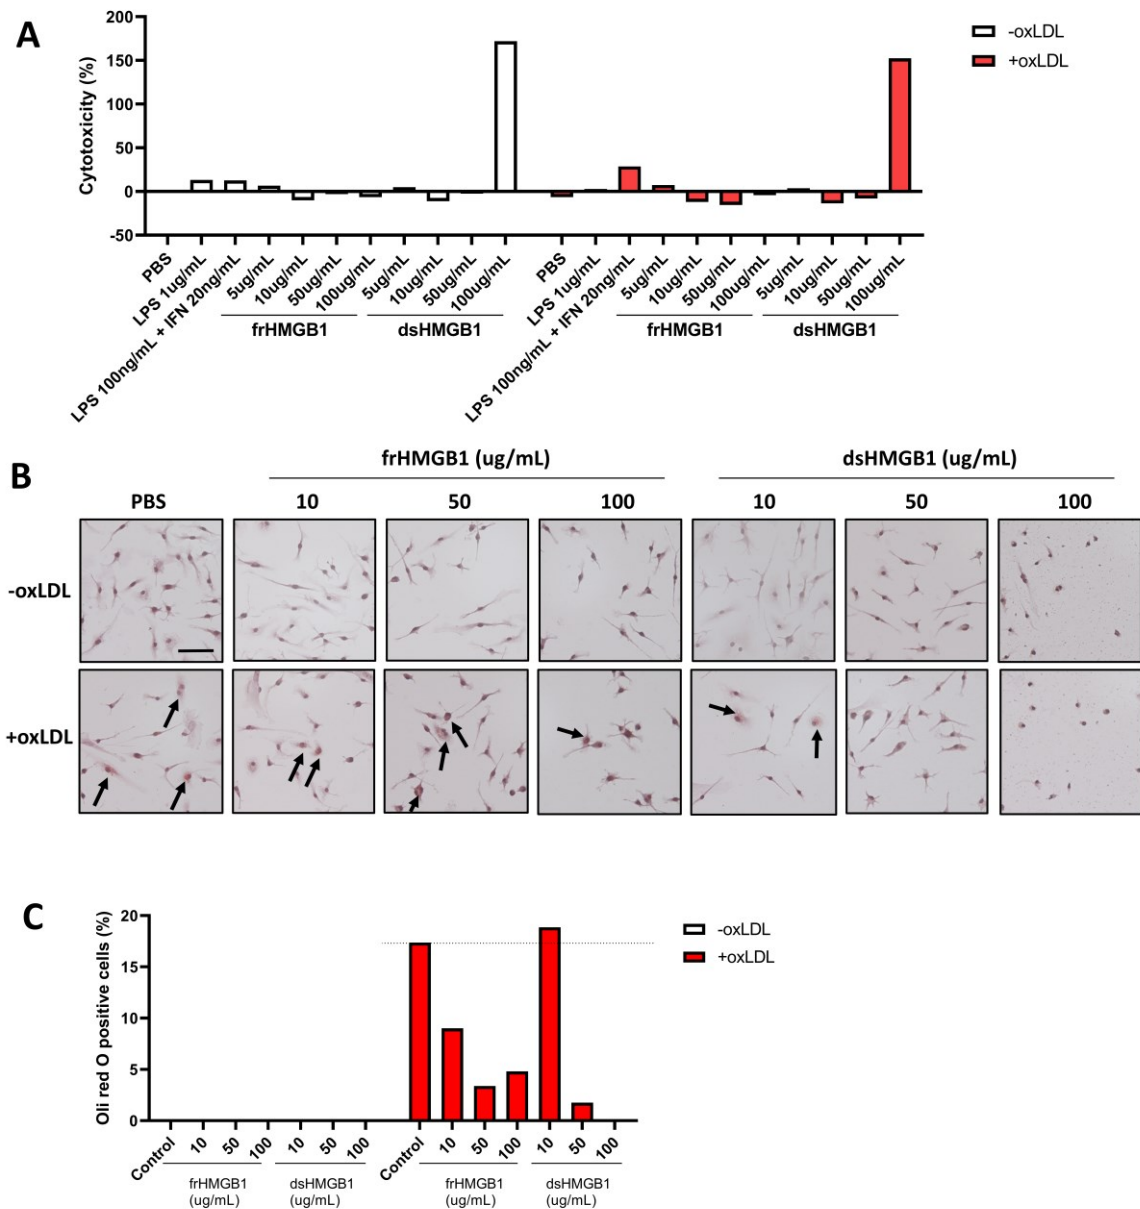

**Supplementary Figure S3. Effects of HMGB1 on foam cell formation from BMDMs.** After incubation with frHMGB1 and dsHMGB1 (10, 50 and 100  $\mu\text{g/mL}$ ), BMDMs were treated with oxLDL (100  $\mu\text{g/mL}$ ) for 24 h. (A) LDH cytotoxicity assay revealed that dsHMGB1 in 100 $\mu\text{g/mL}$  was cytotoxic to BMDMs. (B) Oil Red O staining in oxLDL-induced BMDM with pre-treatment. Scale bar= 10  $\mu\text{m}$ . (C) The percentage of cells with lipid droplets stained using Oil Red O in BMDM with and without oxLDL induction, normalized with haematoxylin-stained nuclear. Three pictures were taken in each condition and average was calculated,  $n=1$ .

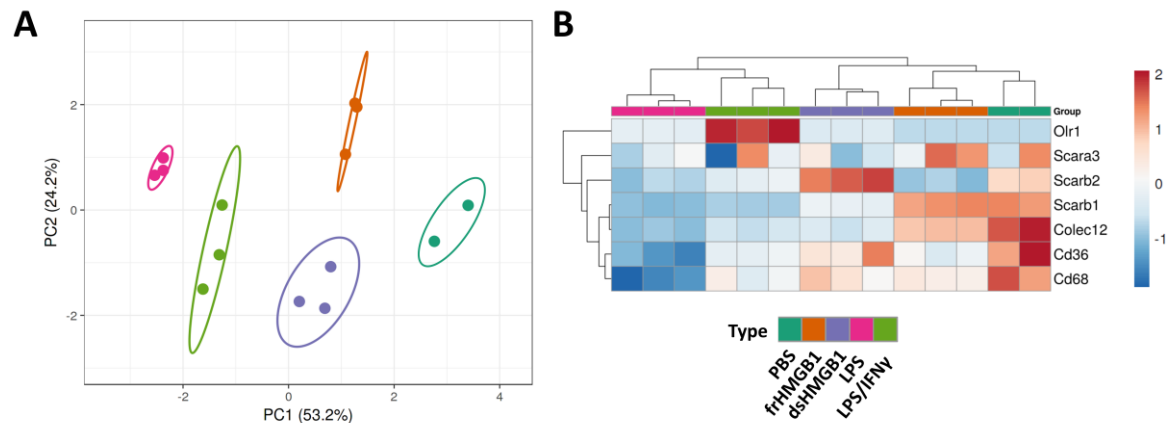

**Supplementary Figure S4. Gene expression of scavenger receptors to oxLDL.** (A) Principle Component plot based on the gene expression of seven scavenger receptors (*Scarb1*, *Scarb2*, *Cd36*, *Colec12*, *Scara3*, *Cd68* and *Olr1*) to oxLDL. (B) Heatmap was created based on the normalized gene counts in each sample. Colour intensity was scaled within each row so that the highest value corresponds to red and the lowest to blue.
